# Supplementary material
Source: PubMed Central journal article supplement (PMC1950560)
Supplement: NIHMS17558-supplement-TableS1.pdf [file NIHMS17558-supplement-TableS1.pdf]

Paradis et al. Supplemental Table S1

| Official Symbol | Genbank Accession Number (NCBI mRNA) | GeneID (Entrez gene) | Previous/Alternate Accession Number and Additional Comments | Category | 5' T7 primer         | 3' T7 primer        |
|-----------------|--------------------------------------|----------------------|-------------------------------------------------------------|----------|----------------------|---------------------|
| Lin7c           | NM 021851                            | 60442                |                                                             | A        | AGAGGGATATCTGCAGAGC  | TGGTGTGTACCGACGAC   |
| Nrp1            | NM 145098                            | 246331               |                                                             | A        | GAAGTGCCTACAGCTGGAC  | TGCCTTCACGCCTCTGAG  |
| Rem2            | NM 022685                            | 64626                |                                                             | A        | TGTGCCCTACAACACCAG   | GCGTTGCTGAAGAACTTGG |
| Tyro3           | NM 017092                            | 25232                |                                                             | A        | CATCATTGCCCTCAAGCGAC | AGCTACTGTGAGGCAGTAG |
| Axl             | NM 001013147*                        | 83625                | XM 218346*                                                  | H        | CGAGACGTCATGGTAGATC  | CTGTAGAAGGACAGAGGAC |
| Dbn1            | NM 031024                            | 81653                |                                                             | L        | GAGCAGCAGATCGAGGAG   | AGTTAGGACCTGGGAGGC  |
| NPas4           | NM 153626                            | 266734               |                                                             | A        | ACTCCGTGCACCTCTACC   | GCTGTCTTGAAGTGGCTC  |
| Mertk           | NM 022943                            | 65037                |                                                             | H        | CTGAGCTCTCAAGGCATCC  | AGGAGTCGTCTGCCAACAG |
| Plxnc1          | XM 001080408                         | 362873               | XM 343200                                                   | A        | GTGGCAGGTTCTGAATTC   | CTGTCAAGGCCACTTCTTC |
| Ncam1           | NM 031521                            | 24586                |                                                             | A        | CCATCTGCGAGCTATCTGG  | CCGTCATGGTTTGGAGTCC |
| Dcamk11         | NM 053343                            | 83825                |                                                             | A        | CGGAAGCAGAGGATCTCTC  | ACAGAACTCCAGCTGCCG  |
| Neol            | XM 001074913                         | 81735                | XM 343402                                                   | A        | CACCATCGTAGTGGTTGTG  | CATGAGTCTTCCAGGTGG  |
| Fos             | NM 022197*                           | 314322               |                                                             | A        | CAGAGCATCGGCAGAAGG   | TCCTTGAGGTCCACAGCC  |
| Plk2            | NM 031821                            | 83722                |                                                             | A        | GGCTTCACTCCAGACAGAC  | CGAACAGCCAGACATCAAC |
| Pcdh8           | NM 022868                            | 64865                |                                                             | A        | CAATGCTCTGGTGCAAGTG  | GGGCCTGGTAGTAATTGTC |
| slit2           | XM 001057837                         | 360272               | AF141386                                                    | A        | ACTGTTGCCAAGGGCACC   | CTCTTGAATGCCTTTAGG  |
| Dcc             | NM 012841                            | 25311                | U68725                                                      | P        | CCACATGGCAGTGTAACTC  | GGCTGGATCCTCTGTTGG  |
| Nrp2            | NM 030869                            | 81527                |                                                             | P        | GACTGGACAGACTCAAAGC  | CTTGTGCTTGAGGCCGTC  |
| Robo1           | NM 022188                            | 58946                |                                                             | P        | ACAGGATTGTCCGGAGGAC  | TCCTGAGCCTCTTGATGAC |
| Robo2           | XM 001064680                         | 84409                | XM 213677                                                   | P        | TCCTGGTTCCAGTATGGAC  | GAAGGTCATTGGCATTCCG |
| Robo3           | XM 236056                            | 315564               | XM 001060907                                                | P        | GGAACTCCCTGTACTTGG   | GAAGACATGCTGCCTGCTG |
| Unc5a           | NM 022206                            | 60629                |                                                             | P        | CTCACACTGCACAAGCCAG  | CTCCCATAGGTTGAGGATC |
| Unc5b           | NM 022207                            | 60630                |                                                             | P        | TCCCAGACAGTATTGAGCC  | CTCACTCTGCCCATCTCC  |
| Unc5c           | NM 199407                            | 362049               |                                                             | P        | CCTGTCATCCTCACTCTGC  | CAGCATGCTCAGGTTTCC  |
| Unc5d           | XM 240446                            | 306534               | XM 001069726                                                | P        | GCCTCCAGATATGCTTGTC  | GTCTGTGATGACGAGC    |
| Nope            | XM 343412                            | 363081               | XM 00107636                                                 | A        | CCCTTTTCTCGATTGCAAG  | TTCTAGAGGACACAGGGC  |
| Sema4c          | XM 237095                            | 301346               | XM 001056875                                                | P        | GAGCTGCAGGTGTTGACC   | ACCACCTCTAGGTGAAGC  |
| Sema4f          | NM 019272                            | 29745                |                                                             | P        | GGAGAGTGCATCGCCAAC   | CAGATCTAAGCCCACCTTG |
| Pard6a          | NM 001003653                         | 307799               | XM 226410                                                   | A        | GAGCAAATTTGACGCCGAG  | GAATTGGCTTGCTCTCTGC |
| Sellh           | NM 177933                            | 314352               |                                                             | A        | CTCTACGGAAGAGGAGTTC  | CTACTGTGGTGGCTGCTG  |
| Daam1           | XM 234275                            | 314212               | XM 001080564                                                | A        | ACATGAGTTGGACCGGATG  | CTGTCCGTCACTGGTTG   |

| Official Symbol | Genbank Accession Number (NCBI mRNA) | GeneID (Entrez gene) | Previous/Alternate Accession Number and Additional Comments | Category | 5' T7 primer          | 3' T7 primer         |
|-----------------|--------------------------------------|----------------------|-------------------------------------------------------------|----------|-----------------------|----------------------|
| Arih1           | NM_001013108                         | 300756               | XM_217157                                                   | U        | CAGTTCGCTGCAAGTGTGG   | AGCCTTCATGCACATGCTG  |
| Pcdh20          | XM_224417                            | 306081               | XM_001074783                                                | A        | CTGACCGTTTCCACTCAGC   | GCTTATGACAGACAGAGCC  |
| Rnf14           | NM_020012                            | 56736                | Mouse                                                       | U        | TCTTCCAGCACAGAGCTTG   | AGTCGTCGTCGTCGCTTC   |
| Fath            | NM_031819                            | 83720                | XM_346489                                                   | A        | GCGGAACCTGAAGACAAGC   | TCACACTTCCGTATGCTGC  |
| Sema4a          | NM_001012078                         | 310630               |                                                             | P        | GTGAAGTCTGGCGTGGAG    | CCTGTGGTCTTGGGAAGG   |
| Sema4b          | XM_001065984                         | 293042               |                                                             | P        | ATCAGTGTGCCCTGGAC     | AGGGAACAGGGAGGATCC   |
| Sema4d          | XM_225215                            | 306790               |                                                             | P        | GTTTGTCTATGCTGGCTCC   | GGAGAGCTCGTCGATACG   |
| Sema5a          | XM_241275^                           | 310207               |                                                             | P        | CCCTGGACACCTGTCAAC    | CTGTCTTCAACAGCATCCG  |
| Sema5b          | XM_239438                            | 303901               |                                                             | P        | TTCGCAAGAGGAGGACG     | GGTGGCTCTGTATCAGG    |
| Sema6a          | XM_341612                            | 361324               |                                                             | P        | TTGTGTGTGTGATCACCGG   | CGAAACAGTCACGGCCTG   |
| Sema6b          | NM_053471                            | 84609                |                                                             | P        | AGCCAAGATCCATACTGCG   | CGCCGCTGTTGAATGTGTG  |
| Sema6c          | NM_017308                            | 29744                |                                                             | P        | AAGGATGGTGATGCAGCGC   | CAGGTACAGGAGGTGCCT   |
| Sema6d          | XM_230583                            | 311384               |                                                             | P        | CGTCAAGGAGTACCAGCAG   | GCTTTGGTGGCACATCAGG  |
| Sema7a          | XM_243863                            | 315711               |                                                             | P        | CAGTGGAGGATACCAGG     | CAGCAGCTCCAGTGTG     |
| Plxna2          | XM_223080                            | 289392               |                                                             | P        | GCTGTGGACATGGACCTG    | GATGTTCCACCTTGTAGGC  |
| Plxna3          | XM_219723                            | 309280               |                                                             | P        | CCGTGTACAAGGGTATTCC   | CTCCAGCTTCTGTGCAAGC  |
| Plxna4          | NM_175750                            | 243743               | Mouse*                                                      | P        | CTGTGTCTGATAGGACCTG   | GATGTCCTCACCTTGAGC   |
| Plxnb1          | XM_236640                            | 316009               |                                                             | P        | CACTCTGAATGACAACCGC   | CTCTGCCAAGACTGAGTTC  |
| Plxnb2          | XM_243652                            | 315217               |                                                             | P        | ACACCTCAATGACACAGG    | CAAGTGTGTTTCAAGGAGTC |
| Plxnb3          | XM_343841                            | 363517               |                                                             | P        | GGTCACCTAACCTTGTGTCAG | AAGCCAGCTGCATCTTCTG  |
| Plxnc1          | XM_343200                            | 362873               |                                                             | P        | ATGTCGGTCTGTCTCTCTG   | CTTCCTCCTTGTAGGTTGG  |
| Plxnd1          | XM_232283                            | 312652               |                                                             | P        | GGTATGGATCACTGAGCG    | CTGTACTGCAGCTGGGTC   |
| Llcam           | NM_017345                            | 50687                |                                                             | P        | CACAATGGAGTGCTCACTG   | TAGGGCTACTGCAGGATTG  |
| Punc            | XM_236346                            | 315759               |                                                             | P        | GTCTTGCACATCAGGAAGG   | CAAGGCCTACATCCTGGG   |
| Lin7a           | NM_053514                            | 85327                |                                                             | H        | CAGCCGCTTACTCTGGAC    | ACGCCGAGCTGTCTCAG    |
| Rnf41           | NM_001012195                         | 362814               |                                                             | U        | AGTGGAGTCTTGGAGGAGC   | CTCCACACCATGTGCAAAG  |
| Dab2ip          | NM_138710                            | 192126               |                                                             | A        | CCAACACCAACCACACCAG   | GTGTGAGGGCACTCATGAG  |
| Sdcbp           | NM_031986                            | 83841                |                                                             | A        | AGGCTCAAAGTGCCTCTTC   | CAGGAATGGTGTGATCCATC |
| Fbl             | NM_001025643                         | 292747               | XM_214836                                                   | A        | AGGCAAGAGAGGAAACCAG   | CGTGGTCTCGTTCATAAGG  |
| Vsnl1           | NM_012686                            | 24877                |                                                             | A        | GAAGTCATGGAGGACCTGG   | TCTGAATGTCGCACTGCAG  |
| Phyhip1         | NM_001012076                         | 309901               | XM_574744#                                                  | A        | GGAGATCAAGAACCTCAGC   | GCTGGGGTCTTTCTTTGCG  |
| Cntn2           | NM_012884                            | 25356                |                                                             | A        | GAGTACCAGAACGGAGACG   | ACAGTGTGGACCACCTTG   |
| Lrrc4c          | XM_230311                            | 311236               | XM_001079006                                                | A        | ACCTTACCACAACCCATG    | GTTGTGTGGTTGAAGGGAG  |

| Official Symbol | Genbank Accession Number (NCBI mRNA) | GeneID (Entrez gene) | Previous/Alternate Accession Number and Additional Comments | Category | 5' T7 primer         | 3' T7 primer         |
|-----------------|--------------------------------------|----------------------|-------------------------------------------------------------|----------|----------------------|----------------------|
| Islr2           | NM_177193                            | 320563               | Mouse                                                       | A        | CTGCCTTCAAGCCTGAAG   | TGTCTGCCTGTAGTTGCCG  |
| Lrrn6a          | XM_001070567                         | 315691               |                                                             | A        | CCTGGTCTATCTCCGTTTC  | GATGCCTGCGTCCGATTTTC |
| Usp14           | NM_001008301                         | 291796               |                                                             | U        | TGTATTTCGCTCTGTGCCTG | AAGCAATGTGCCAGTCTCC  |
| Nedd4l          | XM_001064485                         | 291553               | XM_214557                                                   | U        | GAGACCTGACGTCCCTAAAG | CGAAGCCTTGAGCATTCTC  |
| Psen1           | NM_019163                            | 29192                |                                                             | L        | GAAGACACCAGACTGTAG   | CTGCACGAGATAATCCGTG  |
| Psen2           | NM_031087                            | 81751                |                                                             | L        | CGGTTTCTACACGGAGAAG  | CCAACGTGTCCATGAAAGG  |
| Fmr1            | NM_052804                            | 24948                |                                                             | L        | CGAGAAGATCTGATGGGTC  | TCCATTACAGAGTGGTTGC  |
| Aff2            | XM_219832^                           | 293922               | XM_001054673^                                               | L        | CAACCACAGGAATTGGAGG  | GCGGACAAGATTGGTCATG  |
| Fxr2h           | XM_213335                            | 287433               |                                                             | L        | TCCAGACAGCAACCCTTAC  | GTTATTTCCCAACTCCCTGG |
| MGC94941        | NM_001004233                         | 296988               |                                                             | U        | CAACAGCCACAACATCAGG  | TAGCACTTCTCCACTTGCG  |
| Trim9           | NM_130420                            | 155812               |                                                             | U        | CTCATGGAGTACTGCTTGG  | GGCTATGGAAGCTCTGCTG  |
| Ubqln1          | NM_053747                            | 114590               |                                                             | U        | AGAAACCCAGCGATGATGC  | GGGAACCCAGCAACCTTTC  |
| Rnf4            | NM_019182                            | 29274                |                                                             | U        | ATCCTCAAAGAAAGCGGCG  | GGGATGGTACCCTTATGG   |
| Usp47           | XM_218997                            | 308896               |                                                             | U        | AGTCTCTCTCTCTCACTTC  | ACGATGTCCCGTCTTCTGC  |
| Phr1            | XM_214245                            | 290447               |                                                             | L        | CAAGGAGACACTACGAC    | CTGACAGCTGCAAGGTAG   |
| Gem             | XM_232788                            | 297902               |                                                             | H        | GATGGAGAGAGTGCAACC   | CACAGACAGGTCATGGCAG  |
| Rrad            | NM_053338                            | 83521                |                                                             | H        | CGACTGCAGCTGGAACTC   | CATCTTGCGGCTGTGCG    |
| Rem1            | NM_001025753^                        | 366232               | XM_345457^                                                  | H        | TTCTGTGGGGAGGGTCTC   | TGCGCTGCGTGCTGCAG    |
| Smad1           | NM_013130                            | 25671                |                                                             | L        | CGCTATGAATGTGACCAGC  | TGGAAGGATCGGTGAAACC  |
| Smad2           | NM_019191                            | 29357                |                                                             | L        | GTGTGTACCATAACCAAGC  | ACATGCTTGAGCATCGCAC  |
| Smad3           | NM_013095                            | 25631                |                                                             | L        | GCAGAACGTGAACCAAG    | CTAAGACACGCTGGAACAG  |
| Smad4           | NM_019275                            | 50554                |                                                             | L        | CAGAGTCTAATGCCACCAG  | TCAGTCTAAAGGCTGTGGG  |
| Smad5           | NM_021692                            | 59328                |                                                             | L        | ACAGCCAAGCAAGTGTGTC  | CAGGACTTTATCCAGCCAC  |
| Smad6           | XM_345947                            | 367100               |                                                             | L        | ACACTGTTGGAGGCTGTAG  | GATGAACCTGCGGAGTAG   |
| Madh7           | NM_030858                            | 81516                |                                                             | L        | GTGCAAAGTGTTCAGGTGG  | CTACCGGCTGTTGAAGATG  |
| Smad9           | NM_138872                            | 85435                |                                                             | L        | AGTGCCTTACCATTCCACG  | CTGAGTTAGCACCTTGTCC  |
| Bmpr1a          | NM_030849                            | 81507                |                                                             | L        | CGTGACTTGGAACAGGATG  | CATCTTTGCGAGCGTCTTC  |
| Bmpr1b          | NM_00124259^                         | 310914               | XM_227759^                                                  | L        | CTATGGCGAAGTGTGGATG  | TGGAGAACAGGAACTGTGG  |
| Bmpr2           | XM_217409                            | 140590               |                                                             | L        | GGAGATTCTCTGAAGCAG   | AGGTACACAGCAGTGCTAG  |
| Acvr1           | NM_024486                            | 79558                |                                                             | L        | CTTGCGGTTGCTCTCAGG   | GGATGGGTTCTGGTACCAG  |
| Acvr2a          | NM_031571                            | 29263                |                                                             | L        | GTTCTACTCAGGACCCTG   | ATCCAGCTGATAACCTGGC  |
| Acvr2b          | NM_031554                            | 25366                |                                                             | L        | CAGTTGCTGGAGATCAAGG  | CAGAGAGACGAGACAGTCC  |

| Official Symbol | Genbank Accession Number (NCBI mRNA) | GeneID (Entrez gene) | Previous/Alternate Accession Number and Additional Comments | Category | 5' T7 primer         | 3' T7 primer          |
|-----------------|--------------------------------------|----------------------|-------------------------------------------------------------|----------|----------------------|-----------------------|
| Mef2d           | NM_030860                            | 81518                |                                                             | L        | CCAGGTGACATTCACCAAG  | CATGGCTCCTGCACTAGC    |
| Mef2a           | NM_013597                            | 17258                | Mouse                                                       | L        | GGCTGCCACCTCAGAAC    | AGGGCTTTCTCTGTCCCTC   |
| Cdh2            | NM_031333                            | 83501                | XM_346508                                                   | E        | GGTACCATGCTGACCACTC  | ACCATACATGTCCGGCCAGC  |
| Celsr1          | XM_00178424                          | 300128               | XM_235570                                                   | E        | TTCTCCTGCTGCTGCTTG   | TACATTCATGGCCACACCG   |
| Pcdhb22         | XM_001065549                         | 307486               | XM_226034                                                   | E        | ACCATCTTCGTCTCAGACC  | CTCCTGTAAACACACACCTC  |
| Pcdhb7          | XM_001064651                         | 291652               | XM_226001                                                   | E        | CACCATCACAGTCTCAGAC  | GTAGTTGTGGGACAAGGTC   |
| Pcdhb3          | XM_001064424                         | 291656               | XM_226005                                                   | E        | AGAGAGCAGAGCTGAGTAC  | CTCCTGTGACACACACCTC   |
| Ret             | NM_012643                            | 24716                |                                                             | E        | ACAGCCTCCGCTCTGAAAG  | TGAGGGTGAACCATCCAG    |
| Cdh6            | NM_012927                            | 25409                | XM_346617                                                   | E        | TCGGTGGATAGACACACAG  | GGAGTCTTGTCTACTGTCC   |
| Clstn1          | XM_243040                            | 313717               |                                                             | E        | AGAACCCAAGATCAGCCTG  | CCATTCTAGCTGTCTGTGC   |
| Sema4g          | XM_342055                            | 361764               |                                                             | P        | GGGACTCACAAAGAGATCC  | TGTGTAGCGTACATTGCGC   |
| Enah            | NM_001012150                         | 360891               | XM_573530#                                                  | A        | TGGCGGGATGCTAGACAG   | TGCTGTTGGTGACGGAGG    |
| Fxr1h           | NM_001012179                         | 361927               |                                                             | L        | GTCCAGAAATGAAGAGGCC  | GCTACGATTGCGTCGCTG    |
| Ube2d3          | NM_031237                            | 81920                |                                                             | U        | AGACTATGGCGCTGAAACG  | AGCATCACATGGCATACTTC  |
| Anapc5          | XM_213783                            | 288671               |                                                             | U        | CTGGGAATACAGTCCCTTG  | CTGGAAGTACGACACATCC   |
| Fsmc6           | XM_214147                            | 289990               |                                                             | U        | GTTGGACAGATTGTAGGCG  | CATACCTGCTTCAGTACAAAC |
| Ube2i           | NM_013050                            | 25573                |                                                             | U        | CTTGCGCAGGAGAGGAAAG  | CAATCCCTTCCTCGTCATG   |
| RGD1309823      | XM_001067111                         | 313525               | XM_233423                                                   | U        | AGAAAGCAGCAAGCCAGC   | CAGTTGTACGCAGCATAGC   |
| Fbxl10          | XM_222177                            | 304495               |                                                             | U        | CAGCCTATCAAGTCAGAGC  | AGCCTTCCTTGGTGAATTG   |
| Cdh8            | XM_053393                            | 84408                |                                                             | E        | TGGATTCAACCGCCAGAAG  | GTAGAGTTGCCCCAGTCTC   |
| Pcdhb9          | XM_226046                            | 307490               |                                                             | E        | CACCATCTCAGTCTCAGAC  | GTAACCTTGGGACAGGGTC   |
| Cdh11           | XM_341639                            | 84407                |                                                             | E        | GATCGTCATACTGACCTCG  | GATAGTCGTAGTCCAGGTC   |
| Cdh13           | NM_138889                            | 192248               |                                                             | E        | ACAGCCACCATTGTGATCG  | GGAGTCTTGCAAGAGCAC    |
| Pcdh18          | XM_227117                            | 295027               |                                                             | E        | GCAGAATCCACTTACCAGC  | GTTGATCTCAGCTACCAGC   |
| Pcdhb15         | XM_001065137                         | 291646               | XM_226041                                                   | E        | CATCACAGTACCAGCATG   | CACTGGTTATCCCTGATCC   |
| Cdh9            | XM_226861                            | 29163                |                                                             | E        | TCTGTTGACCGGCATACAG  | AGGAGCTGAGAGAATTGGC   |
| Cdh10           | XM_342202                            | 29181                |                                                             | E        | CTACTTCCAGTCCCATCAG  | CACCACCGTACATTTCTGC   |
| Dtx3            | NM_030714                            | 80904                | Mouse                                                       | U        | GTGACTGTCTCCAAGCCTG  | GTGATGACATTGGGTCTCC   |
| LOC361943       | XM_342242                            | 361943               |                                                             | A        | GAACCTATTCCGACTGGAC  | CTCGGTGTCTGGACAGAG    |
| Pcdhb20         | XM_226036                            | 291642               |                                                             | A        | TCACTGTCTCAGATCTGGG  | CGTTTGTCCCAGTACTTCC   |
| Pcdhal1         | NM_199486                            | 394223               |                                                             | A        | TGGCTGTCTTATGAGCTCC  | TCACTGGTCACTGTTGTCC   |
| Dicer1          | XM_001069041                         | 299284               | XM_216776                                                   | L        | CTTAACCAAGCTGTGGTGAG | TGCAGCAGACTTTGCGATC   |
| Fosb            | NM_001013146                         | 308411               | XM_218419#                                                  | H        | CTTCGTGCCAACGGTCAC   | CTGGCAAATCTCTCACCTC   |
| Fosl1           | NM_012953                            | 25445                |                                                             | H        | GGGCATGTACCGAGACTTC  | TCACAAAGCCAGGAGTGTG   |
| Fosl2           | NM_012954                            | 25446                |                                                             | H        | CAGCAGAAGTCCGGGTAG   | CTACTGCTTCTGCGGTGAG   |

| Official Symbol | Genbank Accession Number (NCBI mRNA) | GeneID (Entrez gene) | Previous/Alternate Accession Number and Additional Comments | Category | 5' T7 primer           | 3' T7 primer           |
|-----------------|--------------------------------------|----------------------|-------------------------------------------------------------|----------|------------------------|------------------------|
| Srf             | NM_020493                            | 20807                | Mouse                                                       | L        | GACACAGGTGCTGTTGCTG    | CATCCAGGTTACCACCTG     |
| Cask            | NM_022184                            | 29647                |                                                             | L        | GCACCTCAGTCTTCGTCATG   | CTAATAGACCCAGGAGACC    |
| Apbal           | NM_031779                            | 83589                |                                                             | L        | GAAGAAGGCTCCTGAAGGC    | GTCAGCAGTCTGTACATGG    |
| LOC311078       | XM_001054967^                        | 311078               | XM_229981^                                                  | L        | TGCAGATCGTTACCTCCTC    | GGAAGGACTTGCCTTGCAC    |
| Tspyl2          | XM_217607                            | 302612               |                                                             | L        | CAGACATATCTCCATGGGC    | ACCACAAAGGCGAAGCTGC    |
| Prkcz           | NM_022507                            | 25522                |                                                             | L        | TGGAAGCTATGCCAAGGTC    | CCTCAGCAGACAGCAGAAG    |
| Pard3           | NM_031235                            | 81918                |                                                             | L        | GACCGAGAGAAGGAGAAGG    | GTGTCTGCAGTCTGTTTCAG   |
| Ptprd           | NM_019140                            | 25529                |                                                             | L        | GGACACGTGACACTCATGC    | GCTGCCCAGGTATTCCAAC    |
| Ptprf           | NM_019249                            | 360406               |                                                             | P        | GCACGAGAAGACAGTGCAC    | AGCTGCCGAGGTATTCCAG    |
| Crebbp          | NM_133381                            | 54244                |                                                             | L        | CTTCTCCGCGAATGACAGC    | GGCACAGTGGTGACTGAAG    |
| Alk             | XM_001067235                         | 266802               | XM_233867                                                   | L        | GGACATTGCCTGTGGCTG     | TCCTTCATGGTGGCGCTG     |
| Ltk             | XM_230479                            | 311337               |                                                             | L        | GAGCTTGAGCTGAGTAAGC    | CAGCTGAGAGCCAAGAAGG    |
| Rosl            | NM_012874                            | 25346                |                                                             | L        | GAAGGAGGCACACCTGATG    | GTGAGCAAGACAGGCATAG    |
| Ryk             | NM_080402                            | 140585               |                                                             | L        | CCAGTATCTGAGAGCTGAC    | CTGGACCAGCTGCTGAAAC    |
| Ror1            | NM_013845                            | 26563                | Mouse                                                       | L        | GTCAGCCATACCGAGGCATTG  | TCATCCAAGGTAAGCACCAG   |
| Ror2            | XM_225181                            | 306782               |                                                             | L        | GAGTTCCTGTCCAGCCAC     | GTTACCTGGAGCGTGTGTC    |
| Ephb1           | XM_217250                            | 24338                |                                                             | L        | CAGCGTCGGGATTTTCTG     | CATCGAGTGGATGCTGCTAAG  |
| Ephb2           | XM_233574                            | 313633               |                                                             | L        | GCCAAGGAAATCGACATCTCC  | CATCACCTGGATACTGTTTCAG |
| Ephb3           | XM_221311                            | 287989               |                                                             | L        | GGCATGAAGTACTTGTCTGAG  | CATGTCTGGATACTGCTGAG   |
| Efnb1           | NM_017089                            | 25186                |                                                             | L        | CCTGAGCAGTTGACTACC     | GCTCTGAGGTGGCATCTC     |
| Efnb2           | XM_225050                            | 306636               |                                                             | L        | GCAAGTCTGCTGGATCAACC   | CTGTGGGGGCATCTCCTG     |
| Efnb3           | XM_340824                            | 360546               |                                                             | L        | GAAGGCCTGGAGAGCTTG     | GCCATCCTGCACAATGTACAC  |
| Nov             | NM_030868                            | 81526                |                                                             | D        | GTCTTCCTGCGAAAGCAATGC  | CTCCTCTGCTCGTCTTCAG    |
| Sncb            | NM_080777*                           | 113893               |                                                             | D        | CTGTCCATGCCAAGGAG      | GGGACAGGAAGGAATTTG     |
| Napb            | NM_019632                            | 17957                | Mouse*                                                      | D        | GTCCAGCTTATGGCGGAG     | TCCATCCCCTTGAATGGAC    |
| Npy2r           | NM_023968                            | 66024                |                                                             | D        | AGGCAGATGAGAATCAAACCTG | GAGGCCATTGTTCTTTTTCAG  |
| Itpr2           | NM_031046                            | 81678                |                                                             | D        | GTTTGCATGCTTGGCTCTTC   | GTGGCATGTGATGGTTCTC    |
| Lin7b           | NM_021758                            | 60377                |                                                             | D        | GGGTGTGGAGCTGCTAG      | ACGAGTAGCTGTGGTGCTG    |
| Ptk2b           | NM_017318                            | 50646                |                                                             | D        | AACATCCTGGTGGCTCTC     | GATTAGCCACACCTTGGC     |

CGTAATACGACTCACTATAGGGAGA T7 promoter sequence is appended to the 5' end of both the 5' and 3' T7 primers  
Mouse = The primers for PCR were designed using mouse cDNA. The PCR was carried out using single-stranded rat DNA template.  
Mouse\* = Mouse cDNA was used to blast the rat genome and PCR primers were designed from the corresponding rat sequence.  
\* = exact primer sequence is no longer in record due to updates that changed sequence by a few nucleotides  
# = primer sequences can be found in this record but not in the new record  
^ = sequence files have been updated such that they are missing region/s that contain sequence that was used to design primers

Categories:

A = gene is regulated by activity (source: activity regulated gene array)  
U = ubiquitination family member regulated by activity (source: activity regulated gene array)  
E = gene is an adhesion molecule expressed in our culture system (source: activity regulated gene array)  
H = gene is a homolog of another gene on the list (source: literature)  
L = gene of interest (source: literature)  
P = neuronal pathfinding gene (source: literature)  
D = gene is regulated over the time course of synapse formation in hippocampal tissue (source:hippocampal tissue array)
